# Supplementary material for: Controls on leaf water hydrogen and oxygen isotopes: a local investigation across seasons and altitude
Source: Copernicus journal article supplement (doi:10.5194/hess-27-599-2023), 2023-01-30
Supplement: Supplementary file 1 [file hess-27-599-2023-supplement.pdf]

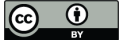

*Supplement of*

## **Controls on leaf water hydrogen and oxygen isotopes: a local investigation across seasons and altitude**

**Jinzhao Liu et al.**

*Correspondence to:* Jinzhao Liu ([liujinzhao@ieecas.cn](mailto:liujinzhao@ieecas.cn))

The copyright of individual parts of the supplement might differ from the article licence.

## Supplementary Figures

**Figure S1:** Boxplots of precipitation, soil water, stem water, and leaf water for  $\delta^{18}\text{O}$  values (a-d) and  $\delta^2\text{H}$  values (e-h). Box plots show the median (red line), interquartile range (IQR) with the upper (75%) and lower (25%) quartiles, lowest whisker still within 1.5 IQR of the lower quartile, and highest whisker still within 1.5 IQR of the upper quartile; dots mark outliers.

**Figure S2:** Dual isotope plots of precipitation, soil water, twig water, and leaf water in May (a), July (b), and September (c).

**Figure S3:** Relationships between altitude and  $\delta^{18}\text{O}$  (a-c) and  $\delta^2\text{H}$  values (d-f) from different water types across months.

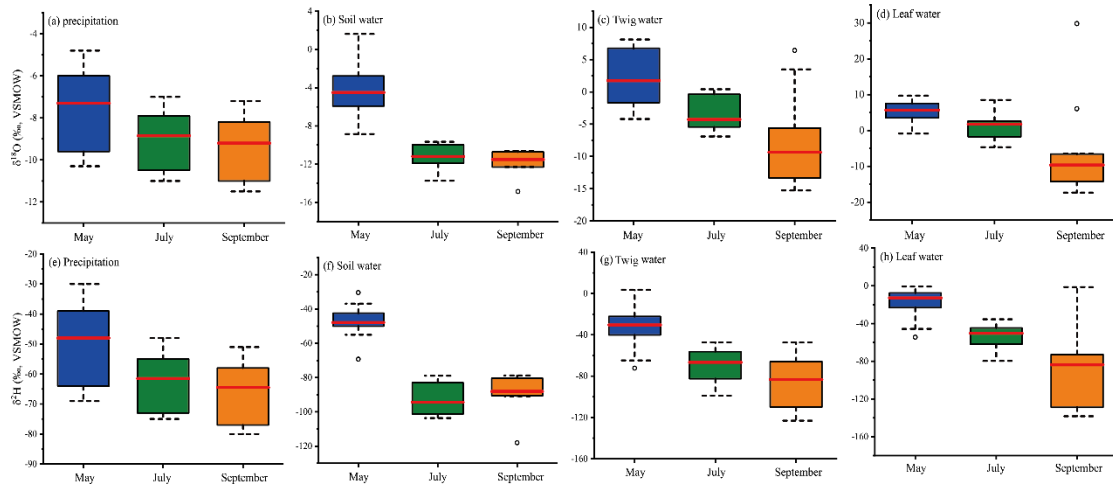

Figure S1

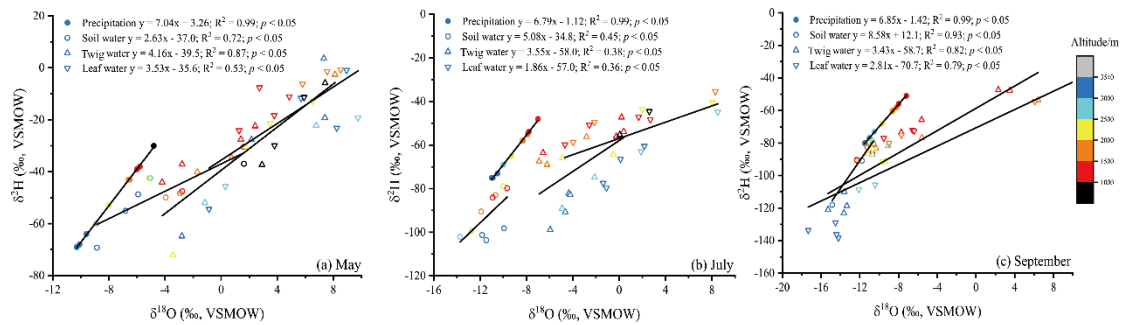

Figure S2

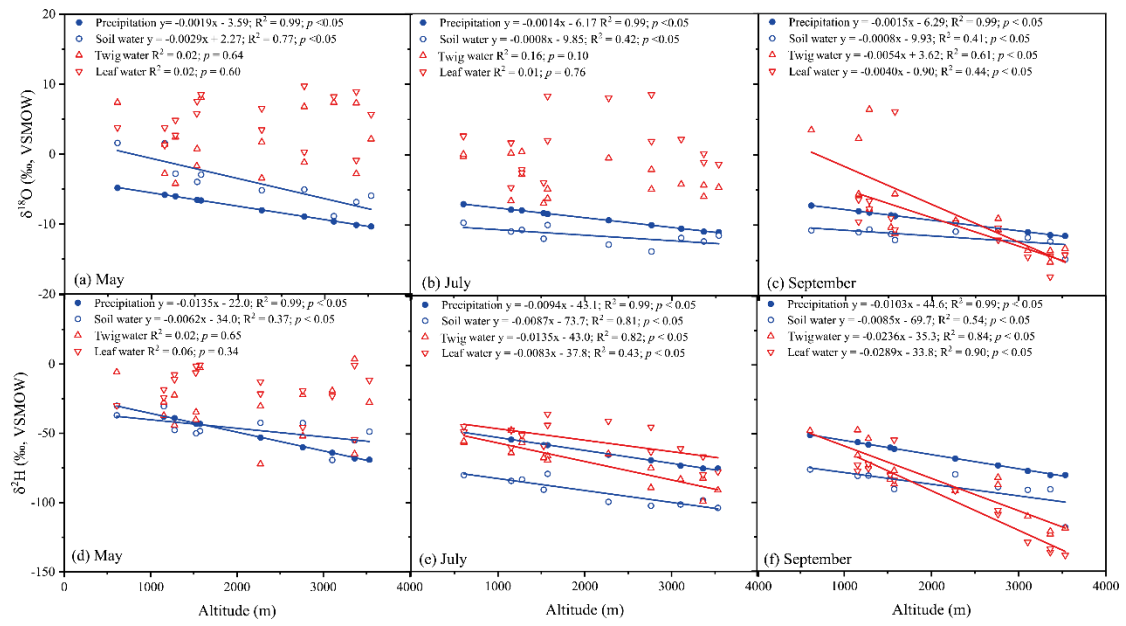

Figure S3
